# Supplementary material
Source: publisher site journal article supplement (https://static.cambridge.org/content/id/urn:cambridge.org:id:article:S0008423913000875/resource/name/Fournier-appendix.doc)
Supplement: Supplementary file 1 [file Fournier-appendix.doc]

**To be placed online**

**Appendix: Variable Construction**

***Demographics***

*Atlantic (0/1):*

- Location of household. [ces08_province / province]

(1 if Newfoundland & Labrador, Prince Edward Island, Nova Scotia, or New Brunswick; 0 otherwise)

*West (0/1):*

(1 if Manitoba, Saskatchewan, Alberta, or British Columbia; 0 otherwise)

*Women (0/1):*

- Respondent’s gender. [gender / rgender]

(1 if female; 0 if male)

*Under 35 years old (0/1):*

- Year of birth. [yearofbirth / cps11_78]

(1 if 18 to 34 years old; 0 otherwise)

*Over 54 years old (0/1):*

(1 if 55 or more years old; 0 otherwise)

*Catholic (0/1)*:

- Please tell me what is your religion, if you have one. [ces08_cps_s9 / cps11_80]

(1 if catholic; 0 otherwise)

*Visible minority (0/1):*

- To what ethnic or cultural group do you belong? [ces08_cps_s14, ces08_cps_s15 / cps11_85, cps11_86]

(1 if visible minority; 0 otherwise)

*Non-francophone (0/1):*

- What is the first language you learned and still understand? [ces08_cps_s17 / cps11_90]

(1 if not French; 0 if French)

*High school dropout (0/1):*

- What is the highest level of education that you have completed? [ces08_cps_s3 / cps11_79]

(1 if incomplete high school; 0 otherwise)

*University graduate (0/1):*

(1 if university degree; 0 otherwise)

*Union household (0/1):*

- Do you belong to a union? / Does anyone in your household belong to a union? [ces08_cps_s6a, ces08_cps_s6b / pes11_93, pes11_94]

(1 if respondent or household member belongs to a union; 0 otherwise)

***General orientations***

*Accommodating Quebec (-1-1) [alpha=.61/.60]:*

- How much do you think should be done for Quebec? [ces08_pes_f7 / pes11_44]

- How do you feel about Quebec? [ces08_pes_c9 / pes11_13]

(1 if much more and really like; -1 if much less and really dislike)

*Quebec sovereignty (-1-1):*

- Are you very favourable, somewhat favourable, somewhat opposed, or very opposed to Quebec sovereignty, that is, Quebec is no longer part of Canada? [ces08_cps_q9, ces08_pes_c10 / cps11_75]

(1 if very favourable; -1 if very opposed)

*Contientalism (-1-1) [alpha=.43/.47]:*

- How do you feel about the United States? [ces08_pes_c8 / pes11_12]

- Do you think Canada’s ties with the United States should be ...? [ces08_pes_f8 / pes11_45]

(1 if really like and much more closer; -1 if really dislike and much more distant)

*Market liberalism (-1-1) [alpha=.54/.55]:*

- The government should leave it entirely to the private sector to create jobs. [ces08_pes_i2n / pes11_22]

- People who don't get ahead should blame themselves, not the system. [ces08_pes_g7 / pes11_49]

- When businesses make a lot of money, everyone benefits, including the poor. [ces08_pes_g1 / pes11_47]

- If people can't find work in the region where they live, they should move to where the jobs are. [ces08_pes_i5n / pes11_24]

- How much should be done to reduce gap between the rich and the poor in Canada? [ces08_pes_f6 / pes11_41]

(1 if strongly agree to first four questions and do much less; -1 if strongly disagree to first four questions and do much more)

*Moral traditionalism (-1-1) [alpha=.53/.56]:*

- Society would be better off if fewer women worked outside the home. [ces08_pes_p3 / pes11_26]

- How much do you think should be done for women? [ces08_pes_i4 / pes11_43]

- How do you feel about feminists? [ces08_pes_c4 / pes11_17]

- How do you feel about gays and lesbians? [ces08_pes_c6 / pes11_16]

(1 if strongly agree, much less, really dislike, and really dislike; -1 if strongly disagree, much more, really like, and really like)

*Political disaffection (-1-1) [alpha=.67/.68]:*

- On the whole, are you very satisfied, fairly satisfied, not very satisfied, or not satisfied at all with the way democracy works in Canada? [ces08_cps_a1, ces08_pes_a1 / cps11_0]

- Do political parties keep their election promises: most of the time, some of the time, or hardly ever? [ces08_pes_g12 / pes11_54]

- And on the same scale, how do you feel about politicians in general? [ces08_pes_f5 / pes11_14]

- The government does not care much about what people like you think. [ces08_pes_g2 / pes11_48]

- Politicians are ready to lie to get elected. [ces08_pes_g4 / pes11_50]

(1 if not satisfied at all, hardly ever, really dislike, strongly agree, and strongly agree; -1 if very satisfied, most of the time, really like, strongly disagree, and strongly disagree)

*Regional alienation (-1-1):*

- In general, does the federal government treat your province better, worse, or about the same as other provinces? [ces08_pes_p12 / pes11_38]

(1 if worse; -1 if better)

***Partisanship***

*Bloc Québécois / Conservative / Liberal / NDP (0/1):*

- In federal politics, do you usually think of yourself as a: Liberal, Conservative, NDP, Bloc Québécois, Green party, or none of these? [ces08_cps_q1a, ces08_pes_k1 / cps11_71]

- How strongly [fill] do you feel: very strongly, fairly strongly, or not very strongly? [ces08_cps_q2, ces08_pes_k2 / cps11_72]

(1 if strongly or fairly strongly identifies; 0 otherwise)

***Economic perceptions***

*Personal retrospective (-1-1):*

- Over the past year, has your financial situation gotten better, gotten worse, or stayed about the same? [ces08_cps_f1, ces08_pes_f1n / cps11_66]

(1 if better; 0 if same or don’t know; -1 if worse)

*National retrospective (-1-1):*

- Over the past year, has Canada’s economy gotten better, gotten worse, or stayed about the same? [ces08_cps_m1, ces08_pes_m1 / cps11_39]

(1 if better; 0 if same or don’t know; -1 if worse)

***Issue positions***

*Personal taxes (-1-1):*

- Should personal incomes taxes be increased, decreased, or kept about the same as now? [ces08_pes_d1k / cps11_30]

(1 if increase; 0 if same or don’t know; -1 if decrease)

*Corporate taxes (-1-1):*

- Should corporate taxes be increased, decreased, or kept about the same as now? [ces08_pes_d1l / cps11_31]

(1 if increase; 0 if same or don’t know; -1 if decrease)

*Health spending (-1-1):*

- Should the federal government spend more, less, or about the same as now on health? [ces08_pes_d1c / cps11_32]

(1 if more; 0 if same or don’t know; -1 if less)

*Defence spending (-1-1):*

- Should the federal government spend more, less, or about the same as now on defence? [ces08_pes_d1a / cps11_37]

(1 if more; 0 if same or don’t know; -1 if less)

*Environment spending (-1-1):*

- Should the federal government spend more, less, or about the same as now on the environment? [ces08_pes_d1f / cps11_35]

(1 if more; 0 if same or don’t know; -1 if less)

*More immigration (-1-1):*

- Do you think Canada should admit more immigrants, fewer immigrants, or about the same as now? [ces08_pes_p6 / pes11_28]

(1 if more; 0 if same or don’t know; -1 if fewer)

***Leader evaluations***

*Duceppe / Harper / Dion / Ignatieff / Layton (-1-1):*

- How do you feel about [fill]? [ces08_cps_g1, ces08_cps_g2, ces08_cps_g3, ces08_cps_g4, ces08_pes_f1, ces08_pes_f2, ces08_pes_f3, ces08_pes_f4 / cps11_23, cps11_24, cps11_25, cps11_26]

(1 if really like; -1 if really dislike)

***Table A-1 The Determinants of Conservative Vote Choice in ROC, 2008***

|  | Model 1 | Model 2 | Model 3 | Model 4 | Model 5 | Model 6 |
| --- | --- | --- | --- | --- | --- | --- |
| ***Demographics*** |  |  |  |  |  |  |
| Atlantic | **-.14 (.04)**** | -.10 (.03)****** | -.10 (.03)****** | -.10 (.03)** | -.11 (.03)** | -.05 (.02)** |
| West | **.10 (.03) **** | .05 (.02)****** | -.00 (.02) | -.01 (.02) | -.00 (.02) | -.01 (.02) |
| Women | **-.06 (.02)**** | .00 (.02) | -.00 (.02) | -.00 (.02) | .00 (.02) | -.00 (.01) |
| Under 35 years old | **-.03 (.04)** | .02 (.03) | -.01 (.03) | -.01 (.03) | -.01 (.03) | -.00 (.02) |
| Over 54 years old | **.01 (.03)** | .01 (.02) | -.03 (.02) | -.02 (.02) | -.02 (.02) | -.02 (.02) |
| Catholic | **-.02 (.03)** | -.04 (.03) | -.01 (.02) | -.01 (.02) | -.02 (.02) | -.02 (.02) |
| Visible minority | **-.22 (.05)**** | -.19 (.05)****** | -.09 (.03)****** | -.10 (.03)** | -.10 (.03)** | -.04 (.03) |
| High school dropout | **-.05 (.04)** | -.07 (.03)****** | .01 (.03) | .00 (.03) | -.00 (.03) | .00 (.02) |
| University graduate | **-.12 (.03)**** | -.07 (.02)****** | -.03 (.02)***** | -.03 (.02)* | -.02 (.02) | -.00 (.01) |
| Union household | **-.09 (.03)**** | -.03 (.02) | -.02 (.02) | -.02 (.02) | -.03 (.02) | -.01 (.02) |
| ***General orientations*** |  |  |  |  |  |  |
| Accommodate Quebec |  | **-.23 (.03)**** | -.10 (.02)****** | -.10 (.02)** | -.08 (.02)** | -.04 (.02)** |
| Continentalism |  | **.30 (.03)**** | .14 (.03)****** | .14 (.03)** | .12 (.03)** | .05 (.03)** |
| Market liberalism |  | **.25 (.03)**** | .11 (.03)****** | .11 (.03)** | .08 (.03)** | .04 (.02)* |
| Moral traditionalism |  | **.22 (.03)**** | .09 (.03)****** | .08 (.03)** | .08 (.03)** | .02 (.02) |
| Political disaffection |  | **-.22 (.03)**** | -.09 (.03)****** | -.09 (.03)** | -.10 (.03)** | -.02 (.02) |
| Regional alienation |  | **-.07 (.02)**** | .02 (.01) | -.02 (.01) | -.02 (.01) | .01 (.01) |
| ***Partisanship*** |  |  |  |  |  |  |
| Conservative |  |  | **.36 (.03)**** | .36 (.03)** | .33 (.03)** | .14 (.02)** |
| Liberal |  |  | **-.23 (.03)**** | -.23 (.03)** | -.22 (.03)** | -.13 (.02)** |
| NDP |  |  | **-.26 (.04)**** | -.25 (.04)** | -.25 (.04)** | -.10 (.03)** |
| ***Economic perceptions*** |  |  |  |  |  |  |
| Personal retrospective |  |  |  | **.01 (.01)** | .01 (.01) | .01 (.01) |
| National retrospective |  |  |  | **.02 (.01)*** | .02 (.01) | .01 (.01) |
| ***Issue positions*** |  |  |  |  |  |  |
| Personal taxes |  |  |  |  | **-.04 (.01)**** | -.02 (.01) |
| Corporate taxes |  |  |  |  | **-.01 (.01)** | -.00 (.01) |
| Health spending |  |  |  |  | **.02 (.02)** | .03 (.02)* |
| Defence spending |  |  |  |  | **.04 (.01)**** | .01 (.01) |
| Environment spend. |  |  |  |  | **-.04 (.01)**** | -.03 (.01)** |
| More immigration |  |  |  |  | **-.01 (.01)** | .01 (.01) |
| ***Leader evaluations*** |  |  |  |  |  |  |
| Stephen Harper |  |  |  |  |  | **.26 (.02)**** |
| Stéphane Dion |  |  |  |  |  | **-.09 (.02)**** |
| Jack Layton |  |  |  |  |  | **-.15 (.02)**** |
| *Number of cases* | 1968 | 1858 | 1852 | 1851 | 1842 | 1835 |
| *Pseudo R-squared* | .06 | .21 | .44 | .44 | .46 | .56 |

Statistical significance: *<.10; **<.05

***Table A-2 The Determinants of Liberal Vote Choice in ROC, 2008***

|  | Model 1 | Model 2 | Model 3 | Model 4 | Model 5 | Model 6 |
| --- | --- | --- | --- | --- | --- | --- |
| ***Demographics*** |  |  |  |  |  |  |
| Atlantic | **.06 (.03)*** | .04 (.03) | .06 (.03)****** | .07 (.03)** | .08 (.03)** | .04 (.02)* |
| West | **-.16 (.02)**** | -.14 (.02)****** | -.05 (.02)****** | -.05 (.02)** | -.06 (.02)** | -.05 (.02)** |
| Women | **.01 (.02)** | -.03 (.02) | -.01 (.02) | -.01 (.02) | -.01 (.02) | -.01 (.02) |
| Under 35 years old | **-.05 (.03)** | -.08 (.03)****** | -.03 (.03) | -.02 (.03) | -.03 (.03) | -.02 (.03) |
| Over 54 years old | **.02 (.02)** | .03 (.02) | .04 (.02)****** | .04 (.02)** | .03 (.02) | .03 (.02) |
| Catholic | **.04 (.03)*** | .06 (.02)****** | .01 (.02) | .01 (.02) | .01 (.02) | .01 (.02) |
| Visible minority | **.27 (.06)**** | .24 (.05)****** | .14 (.05)****** | .14 (.05)** | .15 (.04)** | .09 (.04)** |
| High school dropout | **-.05 (.03)** | -.03 (.03) | -.03 (.03) | -.02 (.03) | -.02 (.03) | -.03 (.03) |
| University graduate | **.13 (.02)**** | .11 (.02)****** | .07 (.02)****** | .07 (.02)** | .05 (.02)** | .04 (.02)** |
| Union household | **-.04 (.02)** | -.05 (.02)***** | -.02 (.02) | -.02 (.02) | -.01 (.02) | -.02 (.02) |
| ***General orientations*** |  |  |  |  |  |  |
| Accommodate Quebec |  | **.17 (.03)**** | .07 (.03)****** | .07 (.03)** | .05 (.03)* | -.00 (.03) |
| Continentalism |  | **-.16 (.03)**** | -.07 (.03)****** | -.07 (.03)** | -.05 (.03)* | .01 (.03) |
| Market liberalism |  | **-.07 (.03)**** | -.03 (.03) | -.03 (.03) | -.01 (.03) | .01 (.03) |
| Moral traditionalism |  | **-.10 (.03)**** | -.04 (.03) | -.04 (.03) | -.03 (.03) | -.01 (.03) |
| Political disaffection |  | **.06 (.03)*** | .01 (.03) | .01 (.03) | .03 (.03) | .-01 (.03) |
| Regional alienation |  | **.05 (02)**** | .01 (.02) | .01 (.02) | .01 (.02) | -.01 (.01) |
| ***Partisanship*** |  |  |  |  |  |  |
| Conservative |  |  | **-.22 (.03)**** | -.22 (.03)** | -.20 (.03)** | -.09 (.03)** |
| Liberal |  |  | **.31 (.03)**** | .31 (.03)** | .31 (.03)** | .22 (.03)** |
| NDP |  |  | **-.13 (.03)**** | -.13 (.03)** | -.12 (.01)** | -.10 (.03)** |
| ***Economic perceptions*** |  |  |  |  |  |  |
| Personal retrospective |  |  |  | **-.01 (.01)** | -.01 (.01) | -.01 (.01) |
| National retrospective |  |  |  | **-.02 (.01)*** | -.01 (.01) | -.00 (.01) |
| ***Issue positions*** |  |  |  |  |  |  |
| Personal taxes |  |  |  |  | **.04 (.02)**** | .02 (.01) |
| Corporate taxes |  |  |  |  | **-.01 (.01)** | -.02 (.01) |
| Health spending |  |  |  |  | **-.06 (.02)**** | -.05 (.02)** |
| Defence spending |  |  |  |  | **-.04 (.01)**** | -.02 (.01)* |
| Environment spend. |  |  |  |  | **.06 (.02)**** | .05 (.01)** |
| More immigration |  |  |  |  | **.01 (.01)** | -.01 (.01) |
| ***Leader evaluations*** |  |  |  |  |  |  |
| Stephen Harper |  |  |  |  |  | **-.16 (.02)**** |
| Stéphane Dion |  |  |  |  |  | **.13 (.02)**** |
| Jack Layton |  |  |  |  |  | **-.01 (.02)** |
| *Number of cases* | 1968 | 1858 | 1852 | 1851 | 1842 | 1835 |
| *Pseudo R-squared* | .06 | .21 | .44 | .44 | .46 | .56 |

Statistical significance: *<.10; **<.05

***Table A-3 The Determinants of NDP Vote Choice in ROC, 2008***

|  | Model 1 | Model 2 | Model 3 | Model 4 | Model 5 | Model 6 |
| --- | --- | --- | --- | --- | --- | --- |
| ***Demographics*** |  |  |  |  |  |  |
| Atlantic | **.08 (.03)**** | .06 (.03)***** | .03 (.03) | .03 (.03) | .03 (.03) | .01 (.02) |
| West | **.06 (.02)**** | .09 (.02)****** | .06 (.02)** | .06 (.02)** | .06 (.02)** | .06 (.02)** |
| Women | **.05 (.02)**** | .02 (.02) | .01 (.02) | .01 (.02) | .01 (.02) | .01 (.01) |
| Under 35 years old | **.09 (.03)**** | .06 (.03)***** | .04 (.03) | .04 (.03) | .03 (.03) | .03 (.02) |
| Over 54 years old | **-.03 (.02)** | -.04 (.02)***** | -.02 (.02) | -.02 (.02) | -.01 (.02) | -.01 (.02) |
| Catholic | **-.02 (.02)** | -.02 (02) | .00 (.02) | .00 (.02) | .00 (.02) | .00 (.02) |
| Visible minority | **-.05 (.04)** | -.05 (.04) | -.05 (.04) | -.05 (.04) | -.05 (.04) | -.04 (.04) |
| High school dropout | **.10 (.04)**** | .10 (.03)****** | .02 (.03) | .02 (.03) | .02 (.03) | .03 (.02) |
| University graduate | **-.01 (.02)** | -.03 (.02)***** | -.04 (.02)****** | -.04 (.02)** | -.03 (.02)* | -.04 (.02)** |
| Union household | **.12 (.03)**** | .08 (.02)****** | .04 (.02)****** | .04 (.02)** | .04 (.02)* | .03 (.02) |
| ***General orientations*** |  |  |  |  |  |  |
| Accommodate Quebec |  | **.06 (.03)**** | .03 (.02) | .03 (.02) | .03 (.02) | .04 (.02)* |
| Continentalism |  | **-.13 (.03)**** | -.07 (.03)****** | -.07 (.03)** | -.07 (.03)** | -.06 (.03)** |
| Market liberalism |  | **-.19 (.03)**** | -.08 (.02)****** | -.08 (.02)** | -.07 (.02)** | -.05 (.02)** |
| Moral traditionalism |  | **-.12 (.03)**** | -.05 (.03)***** | -.05 (.03)* | -.05 (.03)* | -.02 (.03) |
| Political disaffection |  | **.17 (.03)**** | .08 (.02)****** | .08 (.02)** | .07 (.02)** | .04 (.02) |
| Regional alienation |  | **.03 (.02)*** | .01 (.02) | .01 (.02) | .01 (.02) | .00 (.01) |
| ***Partisanship*** |  |  |  |  |  |  |
| Conservative |  |  | **-.14 (.02)**** | -.14 (.02)** | -.13 (.02)** | -.04 (.03)* |
| Liberal |  |  | **-.09 (.02)**** | -.09 (.02)** | -.09 (.02)** | -.09 (.02)** |
| NDP |  |  | **.38 (.05)**** | .38 (.05)** | .37 (.05)** | .20 (.04)** |
| ***Economic perceptions*** |  |  |  |  |  |  |
| Personal retrospective |  |  |  | **.00 (.01)** | .00 (.01) | .01 (.01) |
| National retrospective |  |  |  | **.00 (.01)** | -.00 (.01) | -.01 (.01) |
| ***Issue positions*** |  |  |  |  |  |  |
| Personal taxes |  |  |  |  | **.00 (.01)** | .00 (.01) |
| Corporate taxes |  |  |  |  | **.02 (.01)** | .02 (.01) |
| Health spending |  |  |  |  | **.04 (.02)*** | .02 (.02) |
| Defence spending |  |  |  |  | **-.00 (.01)** | .01 (.01) |
| Environment spend. |  |  |  |  | **-.02 (.01)** | -.02 (.01) |
| More immigration |  |  |  |  | **-.01 (.01)** | -.00 (.01) |
| ***Leader evaluations*** |  |  |  |  |  |  |
| Stephen Harper |  |  |  |  |  | **-.10 (.02)**** |
| Stéphane Dion |  |  |  |  |  | **-.04 (.02)**** |
| Jack Layton |  |  |  |  |  | **.16 (.02)**** |
| *Number of cases* | 1968 | 1858 | 1852 | 1851 | 1842 | 1835 |
| *Pseudo R-squared* | .06 | .21 | .44 | .44 | .46 | .56 |

Statistical significance: *<.10; **<.05

***Table A-4 The Determinants of Conservative Vote Choice in ROC, 2011***

|  | Model 1 | Model 2 | Model 3 | Model 4 | Model 5 | Model 6 |
| --- | --- | --- | --- | --- | --- | --- |
| ***Demographics*** |  |  |  |  |  |  |
| Atlantic | **-.05 (.03)** | -.04 (.03) | -.05 (.02)** | -.05 (.02)** | -.04 (.02)* | -.00 (.02) |
| West | **.11 (.03)**** | .06 (.02)** | .02 (.02) | .01 (.02) | .02 (.02) | .00 (.02) |
| Women | **-.03 (.02)** | .03 (.02) | .03 (.02)* | .04 (.02)** | .04 (.02)** | .03 (.02)* |
| Under 35 years old | **-.04 (.04)** | -.00 (.04) | .03 (.03) | .02 (.03) | .02 (.03) | .03 (.03) |
| Over 54 years old | **-.05 (.03)**** | -.05 (.02)* | -.02 (.02) | -.02 (.02) | -.01 (.02) | .01 (.02) |
| Catholic | **-.01 (.03)** | -.01 (.03) | -.00 (.02) | -.00 (.02) | -.01 (.02) | -.01 (.02) |
| Visible minority | **-.24 (.05)**** | -.19 (.05)** | -.10 (.05)** | -.10 (.05)* | -.10 (.05)** | -.11 (.04)** |
| High school dropout | **.03 (.04)** | .00 (.03) | .01 (.03) | .02 (.03) | .01 (.02) | -.02 (.02) |
| University graduate | **-.14 (.03)**** | -.07 (.02)** | -.05 (.02)** | -.06 (.02)** | -.05 (.02)** | -.01 (.02) |
| Union household | **-.11 (.03)**** | -.05 (.02)** | -.01 (.02) | -.01 (.02) | -.01 (.02) | -.01 (.02) |
| ***General orientations*** |  |  |  |  |  |  |
| Accommodate Quebec |  | **-.22 (.03)**** | -.07 (.02)** | -.07 (.02)** | -.06 (.02)** | .00 (.02) |
| Continentalism |  | **.26 (.04)**** | .11 (.03)** | .10 (.03)** | .07 (.03)** | .03 (.03) |
| Market liberalism |  | **.26 (.03)**** | .12 (.03)** | .11 (.03)** | .09 (.02)** | .06 (.02)** |
| Moral traditionalism |  | **.22 (.03)**** | .07 (.03)** | .07 (.03)** | .04 (.03) | .02 (.02) |
| Political disaffection |  | **-.25 (.04)**** | -.12 (.03)** | -.11 (.03)** | -.10 (.03)** | -.01 (.03) |
| Regional alienation |  | **-.04 (.02)*** | -.02 (.02) | -.02 (.02) | -.02 (.02) | -.02 (.01) |
| ***Partisanship*** |  |  |  |  |  |  |
| Conservative |  |  | **.33 (.03)**** | .32 (.03)** | .29 (.03)** | .12 (.03)** |
| Liberal |  |  | **-.24 (.03)**** | -.24 (.03)** | -.23 (.03)** | -.13 (.03)** |
| NDP |  |  | **-.41 (.05)**** | -.41 (.05)** | -.39 (.05)** | -.26 (.05)** |
| ***Economic perceptions*** |  |  |  |  |  |  |
| Personal retrospective |  |  |  | **.02 (.02)** | .02 (.02) | .01 (.01) |
| National retrospective |  |  |  | **.02 (.01)*** | .03 (.01)** | .01 (.01) |
| ***Issue positions*** |  |  |  |  |  |  |
| Personal taxes |  |  |  |  | **-.03 (.02)**** | -.02 (.01) |
| Corporate taxes |  |  |  |  | **-.05 (.01)**** | -.02 (.01)* |
| Health spending |  |  |  |  | **-.01 (.02)** | -.01 (.02) |
| Defence spending |  |  |  |  | **.03 (.01)**** | .00 (.01) |
| Environment spend. |  |  |  |  | **-.04 (.02)**** | -.01 (.02) |
| More immigration |  |  |  |  | **-.01 (.01)** | .01 (.01) |
| ***Leader evaluations*** |  |  |  |  |  |  |
| Stephen Harper |  |  |  |  |  | **.19 (.02)**** |
| Michael Ignatieff |  |  |  |  |  | **-.09 (.02)**** |
| Jack Layton |  |  |  |  |  | **-.10 (.02)**** |
| *Number of cases* | 1855 | 1758 | 1743 | 1741 | 1733 | 1725 |
| *Pseudo R-squared* | .05 | .19 | .44 | .44 | .46 | .55 |

Statistical significance: *<.10; **<.05

***Table A-5 The Determinants of Liberal Vote Choice in ROC, 2011***

|  | Model 1 | Model 2 | Model 3 | Model 4 | Model 5 | Model 6 |
| --- | --- | --- | --- | --- | --- | --- |
| ***Demographics*** |  |  |  |  |  |  |
| Atlantic | **.04 (.03)** | .04 (.03) | .05 (.02)** | .05 (.02)** | .05 (.02)** | .02 (.02) |
| West | **-.16 (.02)**** | -.14 (.02)** | -.09 (.02)** | -.09 (.02)** | -.09 (.02)** | -.09 (.02)** |
| Women | **-.00 (.02)** | -.01 (.02) | -.02 (.02) | -.02 (.02) | -.01 (.02) | -.02 (.02) |
| Under 35 years old | **.03 (.04)** | .01 (.04) | -.01 (.03) | -.01 (.03) | -.01 (.03) | -.02 (.03) |
| Over 54 years old | **.07 (.02)**** | .07 (.02)** | .04 (.02)** | .04 (.02)** | .04 (.02)** | .02 (.02) |
| Catholic | **.00 (.02)** | -.00 (.02) | -.03 (.02)* | -.03 (.02) | -.03 (.02) | -.02 (.02) |
| Visible minority | **.15 (.06)**** | .10 (.06)* | .01 (.05) | .02 (.05) | .01 (.05) | .02 (.05) |
| High school dropout | **-.04 (.03)** | -.03 (.03) | -.04 (.03) | -.03 (.03) | -.03 (.03) | .00 (.03) |
| University graduate | **.11 (.02)**** | .08 (.02)** | .06 (.02)** | .05 (.02)** | .05 (.02)** | .02 (.02) |
| Union household | **-.02 (.02)** | -.04 (.02)* | -.03 (.02)* | -.03 (.02)* | -.03 (.02)* | -.02 (.02) |
| ***General orientations*** |  |  |  |  |  |  |
| Accommodate Quebec |  | **.17 (.03)**** | .08 (.03)** | .08 (.03)** | .08 (.03)** | .05 (.02)* |
| Continentalism |  | **-.15 (.04)**** | -.07 (.03)** | -.08 (.03)** | -.07 (.03)** | -.05 (.03)* |
| Market liberalism |  | **.02 (.03)** | .01 (.02) | .01 (.03) | .01 (.02) | .03 (.02) |
| Moral traditionalism |  | **-.07 (.03)**** | -.01 (.03) | -.01 (.03) | -.01 (.03) | -.02 (.03) |
| Political disaffection |  | **.13 (.03)**** | .07 (.03)** | .08 (.03)** | .09 (.03)** | .06 (.03)** |
| Regional alienation |  | **.02 (.02)** | .01 (.02) | .01 (.02) | .01 (.02) | .02 (.01) |
| ***Partisanship*** |  |  |  |  |  |  |
| Conservative |  |  | **-.17 (.03)**** | -.17 (.03)** | -.16 (.03)** | -.08 (.03)** |
| Liberal |  |  | **.29 (.03)**** | .30 (.03)** | .29 (.03)** | .18 (.03)** |
| NDP |  |  | **-.15 (.03)**** | -.14 (.03)** | -.14 (.03)** | -.11 (.03)** |
| ***Economic perceptions*** |  |  |  |  |  |  |
| Personal retrospective |  |  |  | **.01 (.02)** | .01 (.02) | .03 (.01)* |
| National retrospective |  |  |  | **.01 (.01)** | .01 (.01) | .01 (.01) |
| ***Issue positions*** |  |  |  |  |  |  |
| Personal taxes |  |  |  |  | **.01 (01)** | -.00 (.01) |
| Corporate taxes |  |  |  |  | **.00 (.01)** | -.01 (.01) |
| Health spending |  |  |  |  | **.01 (.02)** | .02 (.02) |
| Defence spending |  |  |  |  | **-.02 (.01)** | -.00 (.01) |
| Environment spend. |  |  |  |  | **-.02 (.02)** | -.03 (.02)* |
| More immigration |  |  |  |  | **.01 (.01)** | .00 (.01) |
| ***Leader evaluations*** |  |  |  |  |  |  |
| Stephen Harper |  |  |  |  |  | **-.07 (.02)**** |
| Michael Ignatieff |  |  |  |  |  | **.18 (.02)**** |
| Jack Layton |  |  |  |  |  | **-.09 (.02)**** |
| *Number of cases* | 1855 | 1758 | 1743 | 1741 | 1733 | 1725 |
| *Pseudo R-squared* | .05 | .19 | .44 | .44 | .46 | .55 |

Statistical significance: *<.10; **<.05

***Table A-6 The Determinants of NDP Vote Choice in ROC, 2011***

|  | Model 1 | Model 2 | Model 3 | Model 4 | Model 5 | Model 6 |
| --- | --- | --- | --- | --- | --- | --- |
| ***Demographics*** |  |  |  |  |  |  |
| Atlantic | **.01 (.03)** | .00 (.03) | -.00 (.02) | .00 (.02) | -.00 (.02) | -.02 (.02) |
| West | **.04 (.03)*** | .08 (.02)** | .07 (.02)** | .08 (.02)** | .07 (.02)** | .09 (.02)** |
| Women | **.03 (.02)** | -.01 (.02) | -.01 (.02) | -.02 (.02) | -.02 (.02) | -.01 (.02) |
| Under 35 years old | **.02 (.04)** | -.01 (.04) | -.02 (.03) | -.02 (.03) | -.01 (.03) | -.00 (.03) |
| Over 54 years old | **-.01 (.02)** | -.02 (.02) | -.02 (.02) | -.03 (.02) | -.03 (.02) | -.03 (.02) |
| Catholic | **.00 (.03)** | .02 (.03) | .03 (.02) | .03 (.02) | .04 (.02)* | .03 (.02) |
| Visible minority | **.09 (.06)** | .09 (.06) | .09 (.05)* | .08 (.05) | .08 (.05)* | .10 (.04)** |
| High school dropout | **.00 (.04)** | .02 (.04) | .03 (.03) | .02 (.03) | .02 (.03) | .02 (.03) |
| University graduate | **.03 (.02)** | -.01 (.02) | -.01 (.02) | .00 (.02) | -.00 (.02) | -.01 (.02) |
| Union household | **.13 (.02)**** | .09 (.02)** | .04 (.02)** | .04 (.02)** | .04 (.02)** | .03 (.02) |
| ***General orientations*** |  |  |  |  |  |  |
| Accommodate Quebec |  | **.05 (.03)** | -.02 (.03) | -.01 (.03) | -.02 (.03) | -.05 (.03)* |
| Continentalism |  | **-.12 (.04)**** | -.04 (.03) | -.03 (.03) | -.00 (.03) | .03 (.03) |
| Market liberalism |  | **-.28 (.03)**** | -.13 (.03)** | -.12 (.03)** | -.11 (.03)** | -.09 (.03)** |
| Moral traditionalism |  | **-.15 (.04)**** | -.07 (.03)** | -.06 (.03)** | -.04 (.03) | -.01 (.03) |
| Political disaffection |  | **.12 (.03)**** | .05 (.03)* | .03 (.03) | .01 (.03) | -.05 (.03)* |
| Regional alienation |  | **.01 (.02)** | .00 (.02) | .00 (.02) | .00 (.02) | -.00 (.02) |
| ***Partisanship*** |  |  |  |  |  |  |
| Conservative |  |  | **-.16 (.03)**** | -.15 (.03)** | -.13 (.03)** | -.04 (.03) |
| Liberal |  |  | **-.05 (.03)**** | -.05 (.03)** | -.06 (.02)** | -.05 (.02)** |
| NDP |  |  | **.56 (.06)**** | .56 (.06)** | .53 (.06)** | .36 (.06)** |
| ***Economic perceptions*** |  |  |  |  |  |  |
| Personal retrospective |  |  |  | **-.03 (.02)**** | -.03 (.02)** | -.04 (.02)** |
| National retrospective |  |  |  | **-.03 (.01)**** | -.04 (.01)** | -.02 (.01)* |
| ***Issue positions*** |  |  |  |  |  |  |
| Personal taxes |  |  |  |  | **.02 (.02)** | .02 (.02) |
| Corporate taxes |  |  |  |  | **.05 (.01)**** | .03 (.01)** |
| Health spending |  |  |  |  | **-.01 (.02)** | -.01 (.02) |
| Defence spending |  |  |  |  | **-.01 (.01)** | .00 (.01) |
| Environment spend. |  |  |  |  | **.06 (.02)**** | .04 (.02)* |
| More immigration |  |  |  |  | **.00 (.02)** | -.01 (.01) |
| ***Leader evaluations*** |  |  |  |  |  |  |
| Stephen Harper |  |  |  |  |  | **-.12 (.02)**** |
| Michael Ignatieff |  |  |  |  |  | **-.09 (.02)**** |
| Jack Layton |  |  |  |  |  | **.19 (.02)**** |
| *Number of cases* | 1855 | 1758 | 1743 | 1741 | 1733 | 1725 |
| *Pseudo R-squared* | .05 | .19 | .44 | .44 | .46 | .55 |

Statistical significance: *<.10; **<.05

***Table A-7 The Determinants of Bloc Vote Choice in Quebec, 2008***

|  | Model 1 | Model 2 | Model 3 | Model 4 | Model 5 | Model 6 |
| --- | --- | --- | --- | --- | --- | --- |
| ***Demographics*** |  |  |  |  |  |  |
| Women | **.04 (.04)** | .00 (03) | .02 (.03) | .02 (.03) | .02 (.03) | .01 (.03) |
| Under 35 years old | **.03 (.06)** | -.01 (.05) | .02 (.04) | .02 (.04) | .01 (.04) | .01 (.03) |
| Over 54 years old | **-.03 (.05)** | -.05 (.04) | -.05 (.03) | -.05 (.03)* | -.06 (.03)* | -.03 (.03) |
| Non-francophone | **-.43 (.04)**** | -.18 (.07)** | -.13 (.06)** | -.13 (.06)** | -.11 (.06)* | -.09 (.07) |
| High school dropout | **-.09 (.07)** | .04 (.06) | .03 (.05) | .03 (.06) | .02 (.06) | .04 (.05) |
| University graduate | **.02 (.04)** | -.02 (.03) | -.00 (.03) | -.00 (.03) | -.02 (.03) | -.01 (.03) |
| Union household | **.03 (.05)** | -.06 (.04)* | -.09 (.03)** | -.09 (.03)** | -.09 (.03)** | -.09 (.03)** |
| ***General orientations*** |  |  |  |  |  |  |
| Quebec sovereignty |  | **.25 (.02)**** | .12 (.02)** | .12 (.02)** | .12 (.02)** | .08 (.02)** |
| Continentalism |  | **-.03 (.05)** | -.04 (.04) | -.05 (.04) | -.05 (.04) | -.03 (.04) |
| Market liberalism |  | **-.14 (.05)**** | -.13 (.05)** | -.13 (.05)** | -.08 (.05)* | -.05 (.04) |
| Moral traditionalism |  | **-.20 (.05)**** | -.12 (.05)** | -.12 (.05)** | -.10 (.05)** | -.11 (.05)** |
| Political disaffection |  | **.12 (.05)**** | .08 (.05) | .08 (.05) | .05 (.05) | .01 (.05) |
| Regional alienation |  | **.09 (.03)**** | .05 (.03)* | .05 (.03)* | .03 (.03) | .02 (.03) |
| ***Partisanship*** |  |  |  |  |  |  |
| Bloc |  |  | **.22 (.05)**** | .22 (.05)** | .21 (.04)** | .09 (.04)** |
| Conservative |  |  | **-.22 (.10)**** | -.22 (.10)** | -.18 (.10)* | -.05 (.13) |
| Liberal |  |  | **-.25 (.06)**** | .25 (.06)** | -.26 (.06)** | -.24 (.05)** |
| NDP |  |  | **-.27 (.09)**** | -.26 (.09)** | -.26 (.06)** | -.16 (.08)** |
| ***Economic perceptions*** |  |  |  |  |  |  |
| Personal retrospective |  |  |  | **-.00 (.03)** | .00 (.03) | .00 (.03) |
| National retrospective |  |  |  | **.00 (.02)** | .00 (.02) | .02 (.02) |
| ***Issue positions*** |  |  |  |  |  |  |
| Personal taxes |  |  |  |  | **.01 (.02)** | .01 (.02) |
| Corporate taxes |  |  |  |  | **-.02 (.02)** | -.02 (.02) |
| Health spending |  |  |  |  | **.05 (.03)** | .03 (.03) |
| Defence spending |  |  |  |  | **-.06 (.02)**** | -.04 (.02)** |
| Environment spend. |  |  |  |  | **.08 (.03)**** | .06 (.03)** |
| More immigration |  |  |  |  | **.03 (.03)** | .03 (.02) |
| ***Leader evaluations*** |  |  |  |  |  |  |
| Gilles Duceppe |  |  |  |  |  | **.20 (.04)**** |
| Stephen Harper |  |  |  |  |  | **-.11 (.03)**** |
| Stéphane Dion |  |  |  |  |  | **-.05 (.03)** |
| Jack Layton |  |  |  |  |  | **-.11 (.03)**** |
| *Number of cases* | 617 | 595 | 591 | 589 | 582 | 581 |
| *Pseudo R-squared* | .08 | .29 | .46 | .47 | .49 | .60 |

Statistical significance: *<.10; **<.05

***Table A-8 The Determinants of Conservative Vote Choice in Quebec, 2008***

|  | Model 1 | Model 2 | Model 3 | Model 4 | Model 5 | Model 6 |
| --- | --- | --- | --- | --- | --- | --- |
| ***Demographics*** |  |  |  |  |  |  |
| Women | **-.10 (.04)**** | -.08 (.03)** | -.08 (.03)** | -.07 (.03)** | -.07 (.03)** | -.04 (.02)* |
| Under 35 years old | **-.04 (.05)** | -.01 (.05) | -.01 (.04) | -.00 (.05) | .01 (.05) | .03 (.04) |
| Over 54 years old | **.04 (.05)** | .04 (.04) | .05 (.04) | .05 (.04) | .07 (.03)* | .05 (.03)* |
| Non-francophone | **-.01 (.05)** | -.09 (.04)** | -.05 (.04) | -.04 (.04) | -.04 (.04) | .00 (.04) |
| High school dropout | **.08 (.06)** | .02 (.06) | -.02 (.05) | -.01 (.05) | .00 (.05) | -.00 (.04) |
| University graduate | **-.05 (.04)** | -.04 (.04) | -.02 (.03) | -.03 (.03) | -.02 (.03) | .00 (.03) |
| Union household | **-.01 (.04)** | .03 (.04) | .03 (.04) | .03 (.03) | .02 (.03) | .04 (.03) |
| ***General orientations*** |  |  |  |  |  |  |
| Quebec sovereignty |  | **-.09 (.02)**** | -.06 (.02)** | -.06 (.02)** | -.06 (.02)** | .00 (.02) |
| Continentalism |  | **.11 (.06)**** | .07 (.05) | .08 (.05) | .06 (.05) | .02 (.05) |
| Market liberalism |  | **.18 (.06)**** | .14 (.05)** | .13 (.05)** | .09 (.05)* | .03 (.04) |
| Moral traditionalism |  | **.13 (.06)**** | .06 (.05) | .07 (.05) | .06 (.05) | .02 (.04) |
| Political disaffection |  | **-.14 (.05)**** | -.14 (.05)** | -.13 (.05)** | -13 (.05)** | -.09 (.05)* |
| Regional alienation |  | **.00 (.03)** | -.01 (.03) | -.01 (.03) | .01 (.03) | .04 (.03) |
| ***Partisanship*** |  |  |  |  |  |  |
| Bloc |  |  | **-.07 (.05)** | -.07 (.04) | -.06 (.04) | .02 (.04) |
| Conservative |  |  | **.36 (.09)**** | .36 (.09)** | .33 (.09)** | .09 (.07) |
| Liberal |  |  | **-.10 (.04)**** | -.09 (.04)** | -.08 (.04)* | .02 (.04) |
| NDP |  |  | **-.22 (.02)**** | -.22 (.01)** | -.22 (.01)** | -.22 (.01)** |
| ***Economic perceptions*** |  |  |  |  |  |  |
| Personal retrospective |  |  |  | **.01 (.03)** | .02 (.03) | .03 (.02) |
| National retrospective |  |  |  | **.06 (.01)**** | .06 (.02)** | .02 (.02) |
| ***Issue positions*** |  |  |  |  |  |  |
| Personal taxes |  |  |  |  | **-.03 (.02)** | -.02 (.02) |
| Corporate taxes |  |  |  |  | **.02 (.02)** | .01 (.02) |
| Health spending |  |  |  |  | **-.03 (.03)** | -.02 (.02) |
| Defence spending |  |  |  |  | **.04 (.02)*** | .02 (.02) |
| Environment spend. |  |  |  |  | **-.06 (.02)**** | -.03 (.02) |
| More immigration |  |  |  |  | **-.03 (.02)** | -.04 (.02)* |
| ***Leader evaluations*** |  |  |  |  |  |  |
| Gilles Duceppe |  |  |  |  |  | **-.12 (.03)**** |
| Stephen Harper |  |  |  |  |  | **.29 (.04)**** |
| Stéphane Dion |  |  |  |  |  | **-.09 (.03)**** |
| Jack Layton |  |  |  |  |  | **-.00 (.03)** |
| *Number of cases* | 617 | 595 | 591 | 589 | 582 | 581 |
| *Pseudo R-squared* | .08 | .29 | .46 | .47 | .49 | .60 |

Statistical significance: *<.10; **<.05

***Table A-9 The Determinants of Liberal Vote Choice in Quebec, 2008***

|  | Model 1 | Model 2 | Model 3 | Model 4 | Model 5 | Model 6 |
| --- | --- | --- | --- | --- | --- | --- |
| ***Demographics*** |  |  |  |  |  |  |
| Women | **.04 (.03)** | .03 (.03) | .02 (.03) | .01 (.03) | .02 (.03) | .01 (.03) |
| Under 35 years old | **-.06 (.05)** | -.02 (.05) | -.01 (.04) | -.02 (.04) | -.02 (.04) | -.03 (.03) |
| Over 54 years old | **.06 (.04)** | .08 (.04)** | .06 (.03)* | .07 (.03)** | .07 (.03)** | .02 (.03) |
| Non-francophone | **.35 (.06)**** | .16 (.06)** | .08 (.05)* | .07 (.05) | .07 (.04) | .05 (.04) |
| High school dropout | **.03 (.05)** | -.02 (.05) | -.02 (.04) | -.02 (.04) | -.02 (.04) | -.02 (.05) |
| University graduate | **.06 (.04)** | .08 (.04)** | .04 (.03) | .05 (.03)* | .05 (.03)* | .03 (.03) |
| Union household | **-.03 (.04)** | .00 (.04) | .04 (.03) | .04 (.03) | .04 (.03) | .03 (.03) |
| ***General orientations*** |  |  |  |  |  |  |
| Quebec sovereignty |  | **-.15 (.03)**** | -.08 (.02)** | -.07 (.02)** | -.08 (.02)** | -.07 (.02)** |
| Continentalism |  | **.01 (.05)** | .01 (.04) | .01 (.04) | .03 (.05) | .05 (.05) |
| Market liberalism |  | **-.08 (.05)** | -.08 (.04)* | -.07 (.04)* | -.09 (.04)** | -.05 (.04) |
| Moral traditionalism |  | **.07 (.06)** | .07 (.05) | .08 (.05) | .09 (.05)* | .08 (.04)** |
| Political disaffection |  | **.01 (.05)** | .02 (.04) | .02 (.04) | .05 (.05) | .07 (.04)* |
| Regional alienation |  | **-.02 (.03)** | -.00 (.03) | .00 (.03) | .01 (.03) | -.00 (.03) |
| ***Partisanship*** |  |  |  |  |  |  |
| Bloc |  |  | **-.11 (.05)**** | -.11 (.05)** | -.11 (.04)** | -.07 (.04) |
| Conservative |  |  | **-.22 (.03)**** | -.21 (.03)** | -.21 (.03)** | -.15 (.05)** |
| Liberal |  |  | **.33 (.06)**** | .32 (.06)** | .33 (.06)** | .22 (.05)** |
| NDP |  |  | **-.13 (.05)**** | -.14 (.06)** | -.12 (.06)** | -.05 (.08) |
| ***Economic perceptions*** |  |  |  |  |  |  |
| Personal retrospective |  |  |  | **.02 (.03)** | .02 (.02) | .01 (.03) |
| National retrospective |  |  |  | **-.05 (.02)**** | -.05 (.02)** | -.04 (.02)* |
| ***Issue positions*** |  |  |  |  |  |  |
| Personal taxes |  |  |  |  | **.04 (.03)** | .02 (.03) |
| Corporate taxes |  |  |  |  | **-.02 (.02)** | -.00 (.02) |
| Health spending |  |  |  |  | **-.05 (.03)** | -.05 (.03)* |
| Defence spending |  |  |  |  | **.04 (.02)*** | .04 (.02)** |
| Environment spend. |  |  |  |  | **.01 (.02)** | -.01 (.02) |
| More immigration |  |  |  |  | **-.02 (.03)** | -.01 (.02) |
| ***Leader evaluations*** |  |  |  |  |  |  |
| Gilles Duceppe |  |  |  |  |  | **-.06 (.03)*** |
| Stephen Harper |  |  |  |  |  | **-.11 (.03)**** |
| Stéphane Dion |  |  |  |  |  | **.20 (.04)**** |
| Jack Layton |  |  |  |  |  | **-.06 (.04)** |
| *Number of cases* | 617 | 595 | 591 | 589 | 582 | 581 |
| *Pseudo R-squared* | .08 | .29 | .46 | .47 | .49 | .60 |

Statistical significance: *<.10; **<.05

***Table A-10 The Determinants of NDP Vote Choice in Quebec, 2008***

|  | Model 1 | Model 2 | Model 3 | Model 4 | Model 5 | Model 6 |
| --- | --- | --- | --- | --- | --- | --- |
| ***Demographics*** |  |  |  |  |  |  |
| Women | **.02 (.03)** | .04 (.03) | .04 (.02) | .04 (.02) | .03 (.03) | .02 (.03) |
| Under 35 years old | **.07 (.04)*** | .04 (.04) | .01 (.03) | .00 (.03) | -.00 (.03) | -.01 (.03) |
| Over 54 years old | **-.07 (.03)**** | -.07 (.03)** | -.06 (.02)** | -.07 (.02)** | -.08 (.02)** | -.05 (.02)** |
| Non-francophone | **.09 (.05)*** | .10 (.06) | .10 (.06) | .09 (.06) | .08 (.06) | .03 (.05) |
| High school dropout | **-.03 (.04)** | -.03 (.04) | .01 (.04) | .00 (.03) | .00 (.04) | -.02 (.04) |
| University graduate | **-.02 (.03)** | -.03 (.03) | -.01 (.03) | -.02 (.03) | -.02 (.03) | -.02 (.02) |
| Union household | **.01 (.03)** | .03 (.03) | .02 (.03) | .02 (.03) | .03 (.03) | .02 (.02) |
| ***General orientations*** |  |  |  |  |  |  |
| Quebec sovereignty |  | **-.01 (.02)** | .02 (.02) | .01 (.02) | .01 (.02) | -.01 (.02) |
| Continentalism |  | **-.09 (.04)**** | -.03 (.03) | -.04 (.03) | -.04 (.03) | -.04 (.03) |
| Market liberalism |  | **.04 (.05)** | .07 (.04)* | .08 (.04)** | .08 (.04)** | .07 (.04)** |
| Moral traditionalism |  | **.01 (.05)** | -.01 (.04) | -.02 (.04) | -.05 (.04) | -.00 (.04) |
| Political disaffection |  | **.02 (.05)** | .04 (.05) | .03 (.05) | .03 (.05) | .00 (.04) |
| Regional alienation |  | **-.07 (.03)**** | -.03 (.04) | -.04 (.02) | -.05 (.03)* | -.05 (.03)** |
| ***Partisanship*** |  |  |  |  |  |  |
| Bloc |  |  | **-.03 (.02)** | -.04 (.04) | -.04 (.04) | -.04 (.03) |
| Conservative |  |  | **.08 (.07)** | .08 (.07) | .06 (.07) | .10 (.10) |
| Liberal |  |  | **.02 (.05)** | .02 (.05) | .00 (.05) | -.01 (.05) |
| NDP |  |  | **.62 (.10)**** | .62 (.10)** | .60 (.10)** | .43 (.10)** |
| ***Economic perceptions*** |  |  |  |  |  |  |
| Personal retrospective |  |  |  | **-.02 (.02)** | -.03 (.02) | -.04 (.02)* |
| National retrospective |  |  |  | **-.01 (.02)** | -.01 (.02) | -.01 (.02) |
| ***Issue positions*** |  |  |  |  |  |  |
| Personal taxes |  |  |  |  | **-.01 (.02)** | -.01 (.02) |
| Corporate taxes |  |  |  |  | **.02 (.02)** | .01 (.02) |
| Health spending |  |  |  |  | **.03 (.03)** | .04 (.03) |
| Defence spending |  |  |  |  | **-.01 (.02)** | -.01 (.02) |
| Environment spend. |  |  |  |  | **-.02 (.02)** | -.02 (.02) |
| More immigration |  |  |  |  | **.01 (.02)** | .02 (.02) |
| ***Leader evaluations*** |  |  |  |  |  |  |
| Gilles Duceppe |  |  |  |  |  | **-.03 (.03)** |
| Stephen Harper |  |  |  |  |  | **-.06 (.03)**** |
| Stéphane Dion |  |  |  |  |  | **-.07 (.02)**** |
| Jack Layton |  |  |  |  |  | **.16 (.04)**** |
| *Number of cases* | 617 | 595 | 591 | 589 | 582 | 581 |
| *Pseudo R-squared* | .08 | .29 | .46 | .47 | .49 | .60 |

Statistical significance: *<.10; **<.05

***Table A-11 The Determinants of Bloc Vote Choice in Quebec, 2011***

|  | Model 1 | Model 2 | Model 3 | Model 4 | Model 5 | Model 6 |
| --- | --- | --- | --- | --- | --- | --- |
| ***Demographics*** |  |  |  |  |  |  |
| Women | **.01 (.03)** | .03 (.03) | .01 (.03) | .01 (.03) | .01 (.03) | .00 (.03) |
| Under 35 years old | **-.04 (.05)** | -.01 (.04) | -.00 (.04) | -.01 (.04) | -.00 (.04) | .01 (.04) |
| Over 54 years old | **.03 (.04)** | .03 (.03) | .05 (.03)* | .06 (.03)* | .06 (.03)** | .06 (.03)** |
| Non-francophone | **-.25 (.02)**** | -.17 (.04)** | -.13 (.04)** | -.13 (.04)** | -.12 (.04)** | -.10 (.04)** |
| High school dropout | **-.03 (.05)** | -.03 (.04) | -.03 (.04) | -.03 (.04) | -.02 (.04) | -.02 (.05) |
| University graduate | **.09 (.04)**** | .08 (.03)** | .06 (.03)** | .05 (.03)* | .05 (.03)* | .06 (.03)** |
| Union household | **.05 (.03)** | -.03 (.03) | -.02 (.03) | -.03 (.03) | -.03 (.03) | -.03 (.03) |
| ***General orientations*** |  |  |  |  |  |  |
| Quebec sovereignty |  | **.23 (.02)**** | .16 (.02)** | .16 (.02)** | .17 (.02)** | .15 (.02)** |
| Continentalism |  | **-.15 (.05)**** | -.13 (.04)** | -.13 (.05)** | -.13 (.05)** | -.11 (.05)** |
| Market liberalism |  | **.02 (.05)** | .04 (.04) | .03 (.05) | .03 (.05) | .06 (.05) |
| Moral traditionalism |  | **.03 (.04)** | .09 (.04)** | .09 (.04)** | .08 (.04)** | .07 (.04) |
| Political disaffection |  | **-.03 (.05)** | -.05 (.05) | -.04 (.04) | -.03 (.05) | -.02 (.05) |
| Regional alienation |  | **-.01 (.03)** | -.03 (.03) | -.02 (.03) | -.02 (.03) | -.02 (.03) |
| ***Partisanship*** |  |  |  |  |  |  |
| Bloc |  |  | **.17 (.04)**** | .18 (.04)** | .19 (.05)** | .11 (.04)** |
| Conservative |  |  | **-.16 (.06)**** | -.17 (.06)** | -.16 (.06)** | -.14 (.07)** |
| Liberal |  |  | **-.08 (.05)*** | -.08 (.05)* | -.07 (.04) | -.06 (.05) |
| NDP |  |  | **-.13 (.05)**** | -.13 (.05)** | -.11 (.05)** | -.08 (.05)* |
| ***Economic perceptions*** |  |  |  |  |  |  |
| Personal retrospective |  |  |  | **.05 (.02)**** | .04 (.02)* | .04 (.02)* |
| National retrospective |  |  |  | **.00 (.02)** | .00 (.02) | -.00 (.02) |
| ***Issue positions*** |  |  |  |  |  |  |
| Personal taxes |  |  |  |  | **.01 (.02)** | .01 (.02) |
| Corporate taxes |  |  |  |  | **-.04 (.02)** | -.03 (.02) |
| Health spending |  |  |  |  | **-.01 (.03)** | -.01 (.03) |
| Defence spending |  |  |  |  | **-.02 (.02)** | -.01 (.02) |
| Environment spend. |  |  |  |  | **-.03 (.02)** | -.03 (.03) |
| More immigration |  |  |  |  | **.02 (.03)** | .02 (.02) |
| ***Leader evaluations*** |  |  |  |  |  |  |
| Gilles Duceppe |  |  |  |  |  | **.16 (.05)**** |
| Stephen Harper |  |  |  |  |  | **-.00 (.03)** |
| Michael Ignatieff |  |  |  |  |  | **.01 (.03)** |
| Jack Layton |  |  |  |  |  | **-.17 (.05)**** |
| *Number of cases* | 722 | 694 | 691 | 690 | 684 | 682 |
| *Pseudo R-squared* | .06 | .23 | .36 | .36 | .39 | .45 |

Statistical significance: *<.10; **<.05

***Table A-12 The Determinants of Conservative Vote Choice in Quebec, 2011***

|  | Model 1 | Model 2 | Model 3 | Model 4 | Model 5 | Model 6 |
| --- | --- | --- | --- | --- | --- | --- |
| ***Demographics*** |  |  |  |  |  |  |
| Women | **-.02 (.03)** | .02 (.03) | .01 (.03) | .00 (.03) | .00 (.03) | .00 (.02) |
| Under 35 years old | **.04 (.05)** | .05 (.04) | .01 (.04) | .01 (.04) | -.01 (.03) | -.01 (.03) |
| Over 54 years old | **.00 (.04)** | -.02 (.03) | .00 (.03) | .00 (.03) | .00 (.03) | -.03 (.03) |
| Non-francophone | **.13 (.05)**** | .05 (.04) | .07 (.04)* | .07 (.04)* | .10 (.04)** | .05 (.04) |
| High school dropout | **.12 (.06)**** | .09 (.06) | .07 (.05) | .06 (.05) | .07 (.05) | .05 (.04) |
| University graduate | **-.03 (.04)** | -.01 (.03) | -.02 (.03) | -.01 (.03) | -.01 (.03) | .01 (.03) |
| Union household | **-.01 (.03)** | .03 (.03) | .02 (.03) | .02 (.03) | .02 (.03) | .03 (.02) |
| ***General orientations*** |  |  |  |  |  |  |
| Quebec sovereignty |  | **-.09 (.03)**** | -.06 (.02)** | -.06 (.02)** | -.05 (.02)** | .00 (.02) |
| Continentalism |  | **.16 (.05)**** | .12 (.04)** | .12 (.04)** | .09 (.04)** | .04 (.04) |
| Market liberalism |  | **.12 (.04)**** | .03 (.04) | .04 (.04) | .01 (.04) | .00 (.03) |
| Moral traditionalism |  | **.11 (.04)**** | .04 (.04) | .04 (.04) | .02 (.04) | -.01 (.04) |
| Political disaffection |  | **-.10 (.05)**** | -.04 (.04) | -.05 (.04) | -.07 (.04)* | -.06 (.04) |
| Regional alienation |  | **-.05 (.03)*** | -.03 (.02) | -.03 (.02) | -.02 (.02) | .02 (.02) |
| ***Partisanship*** |  |  |  |  |  |  |
| Bloc |  |  | **-.11 (.04)**** | -.11 (.04)** | -.10 (.04)** | -.08 (.04)* |
| Conservative |  |  | **.41 (.08)**** | .42 (.08)** | .37 (.08)** | .12 (.06)** |
| Liberal |  |  | **-.11 (.03)**** | -.11 (.03)** | -.11 (.03)** | -.07 (.03)** |
| NDP |  |  | **-.11 (.05)**** | -.11 (.05)** | -.10 (.05)** | -.04 (.05) |
| ***Economic perceptions*** |  |  |  |  |  |  |
| Personal retrospective |  |  |  | **-.01 (.02)** | -.00 (.02) | .01 (02) |
| National retrospective |  |  |  | **-.02 (.02)** | -.00 (.02) | .00 (.02) |
| ***Issue positions*** |  |  |  |  |  |  |
| Personal taxes |  |  |  |  | **-.01 (.02)** | -.00 (.02) |
| Corporate taxes |  |  |  |  | **-.02 (.02)** | -.01 (.02) |
| Health spending |  |  |  |  | **-.05 (.02)*** | -.04 (.02)** |
| Defence spending |  |  |  |  | **.04 (.02)**** | .02 (.02) |
| Environment spend. |  |  |  |  | **-.07 (.02)**** | -.05 (.02)** |
| More immigration |  |  |  |  | **-.07 (.02)**** | -.04 (.02)** |
| ***Leader evaluations*** |  |  |  |  |  |  |
| Gilles Duceppe |  |  |  |  |  | **-.06 (.03)**** |
| Stephen Harper |  |  |  |  |  | **.20 (.03)**** |
| Michael Ignatieff |  |  |  |  |  | **-.05 (.03)*** |
| Jack Layton |  |  |  |  |  | **-.11 (.03)**** |
| *Number of cases* | 722 | 694 | 691 | 690 | 684 | 682 |
| *Pseudo R-squared* | .06 | .23 | .36 | .36 | .39 | .45 |

Statistical significance: *<.10; **<.05

***Table A-13 The Determinants of Liberal Vote Choice in Quebec, 2011***

|  | Model 1 | Model 2 | Model 3 | Model 4 | Model 5 | Model 6 |
| --- | --- | --- | --- | --- | --- | --- |
| ***Demographics*** |  |  |  |  |  |  |
| Women | **.03 (.03)** | .03 (.03) | .03 (.02) | .03 (.02) | .04 (.02) | .04 (.02)* |
| Under 35 years old | **-.04 (.04)** | -.05 (.04) | -.01 (.04) | -.01 (.04) | -.02 (.03) | -.02 (.03) |
| Over 54 years old | **.03 (.03)** | .02 (.03) | -.00 (.03) | -.00 (.03) | .00 (.03) | -.01 (.03) |
| Non-francophone | **.16 (.04)**** | .11 (.04)** | .04 (.03) | .04 (.03) | .05 (.04) | .06 (.04)* |
| High school dropout | **-.00 (.04)** | -.01 (.05) | .01 (.04) | .01 (.04) | .00 (.04) | .00 (.04) |
| University graduate | **.02 (.03)** | .02 (.03) | .04 (.03) | .04 (.03) | .03 (.03) | .02 (.03) |
| Union household | **-.09 (.03)**** | -.07 (.02)** | -.04 (.02) | -.04 (.02) | -.04 (.02) | -.04 (.02) |
| ***General orientations*** |  |  |  |  |  |  |
| Quebec sovereignty |  | **-.06 (.02)**** | -.03 (.02) | -.03 (.02) | -.03 (.02) | -.02 (.02) |
| Continentalism |  | **-.04 (.05)** | -.03 (.04) | -.03 (.04) | -.01 (.04) | -.01 (.04) |
| Market liberalism |  | **-.01 (.04)** | .02 (.03) | .02 (.03) | .02 (.04) | .02 (.04) |
| Moral traditionalism |  | **.03 (.04)** | .01 (.03) | .00 (.03) | .01 (.03) | .02 (.03) |
| Political disaffection |  | **-.06 (.04)** | -.04 (.04) | -.05 (.04) | -.02 (.04) | -.03 (.05) |
| Regional alienation |  | **-.02 (.02)** | -.03 (.02) | -.03 (.02) | -.02 (.02) | -.01 (.02) |
| ***Partisanship*** |  |  |  |  |  |  |
| Bloc |  |  | **-.02 (.04)** | -.02 (.04) | -.03 (.04) | -.01 (.04) |
| Conservative |  |  | **-.14 (.01)**** | -.14 (.01)** | -.14 (.01)** | -.14 (.01)** |
| Liberal |  |  | **.23 (.05)**** | .23 (.05)** | .22 (.05)** | .16 (.04)** |
| NDP |  |  | **-.10 (.04)**** | -.09 (.04)** | -.09 (.04)** | -.08 (.04)* |
| ***Economic perceptions*** |  |  |  |  |  |  |
| Personal retrospective |  |  |  | **-.01 (.02)** | -.01 (.02) | -.02 (.02) |
| National retrospective |  |  |  | **.00 (.02)** | -.01 (.02) | -.01 (.02) |
| ***Issue positions*** |  |  |  |  |  |  |
| Personal taxes |  |  |  |  | **.03 (.02)** | .02 (.02) |
| Corporate taxes |  |  |  |  | **-.01 (.02)** | -.01 (.02) |
| Health spending |  |  |  |  | **-.04 (.02)*** | -.05 (.02)** |
| Defence spending |  |  |  |  | **-.01 (.02)** | -.00 (.02) |
| Environment spend. |  |  |  |  | **.01 (.02)** | .00 (.02) |
| More immigration |  |  |  |  | **.05 (.02)**** | .05 (.02)** |
| ***Leader evaluations*** |  |  |  |  |  |  |
| Gilles Duceppe |  |  |  |  |  | **-.03 (.03)** |
| Stephen Harper |  |  |  |  |  | **-.05 (.02)**** |
| Michael Ignatieff |  |  |  |  |  | **.11 (.03)**** |
| Jack Layton |  |  |  |  |  | **-.05 (.03)*** |
| *Number of cases* | 722 | 694 | 691 | 690 | 684 | 682 |
| *Pseudo R-squared* | .06 | .23 | .36 | .36 | .39 | .45 |

Statistical significance: *<.10; **<.05

***Table A-14 The Determinants of NDP Vote Choice in Quebec, 2011***

|  | Model 1 | Model 2 | Model 3 | Model 4 | Model 5 | Model 6 |
| --- | --- | --- | --- | --- | --- | --- |
| ***Demographics*** |  |  |  |  |  |  |
| Women | **-.02 (.04)** | -.07 (.04)* | -.05 (.04) | -.05 (.04) | -.05 (.04) | -.05 (.04) |
| Under 35 years old | **.03 (.06)** | .02 (.06) | .00 (.06) | .01 (.06) | .03 (.06) | .02 (.05) |
| Over 54 years old | **-.06 (.04)** | -.03 (.04) | -.05 (.04) | -.06 (.04) | -.06 (.04) | -.02 (.04) |
| Non-francophone | **-.04 (.05)** | .01 (.06) | .02 (.06) | .02 (.06) | -.03 (.06) | -.02 (.05) |
| High school dropout | **-.09 (.06)** | -.06 (.06) | -.05 (.06) | -.05 (.06) | -.06 (.06) | -.04 (.06) |
| University graduate | **-.08 (.04)*** | -.09 (.04)** | -.09 (.04)** | -.08 (.04)** | -.07 (.04)* | -.09 (.04)** |
| Union household | **.04 (.04)** | .06 (.04) | .04 (.04) | .05 (.04) | .04 (.04) | .04 (.04) |
| ***General orientations*** |  |  |  |  |  |  |
| Quebec sovereignty |  | **-.08 (.03)**** | -.07 (.03)** | -.07 (.03)** | -.09 (.03)** | -.14 (.03)** |
| Continentalism |  | **.03 (.06)** | .04 (.06) | .05 (.06) | .05 (.06) | .08 (.06) |
| Market liberalism |  | **-.13 (.06)**** | -.09 (.06) | -.09 (.06) | -.06 (.06) | -.08 (.05) |
| Moral traditionalism |  | **-.17 (.06)**** | -.14 (.06)** | -.13 (.06)** | -.12 (.06)** | -.08 (.06) |
| Political disaffection |  | **.18 (.06)**** | .14 (.06)** | .13 (.06)** | .12 (.06)** | .11 (.06)* |
| Regional alienation |  | **.08 (.04)**** | .08 (.03)** | .08 (.03)** | .05 (.03) | .02 (.03) |
| ***Partisanship*** |  |  |  |  |  |  |
| Bloc |  |  | **-.04 (.06)** | -.05 (.06) | -.06 (.06) | -.02 (.06) |
| Conservative |  |  | **-.11 (.09)** | -.11 (.09) | -.07 (.09) | .16 (.08)* |
| Liberal |  |  | **-.04 (.06)** | -.04 (.06) | -.04 (.06) | -.02 (.06) |
| NDP |  |  | **.33 (.08)**** | .33 (.08)** | .31 (.07)** | .20 (.07)** |
| ***Economic perceptions*** |  |  |  |  |  |  |
| Personal retrospective |  |  |  | **-.04 (.03)** | -.03 (.03) | -.03 (.03) |
| National retrospective |  |  |  | **.02 (.03)** | .01 (.03) | .01 (.03) |
| ***Issue positions*** |  |  |  |  |  |  |
| Personal taxes |  |  |  |  | **-.03 (.03)** | -.03 (.03) |
| Corporate taxes |  |  |  |  | **.07 (.03)**** | .05 (.03) |
| Health spending |  |  |  |  | **.09 (.04)**** | .10 (.04)** |
| Defence spending |  |  |  |  | **-.01 (.03)** | -.01 (.03) |
| Environment spend. |  |  |  |  | **.09 (.03)**** | .08 (.03)** |
| More immigration |  |  |  |  | **-.01 (.03)** | -.02 (.03) |
| ***Leader evaluations*** |  |  |  |  |  |  |
| Gilles Duceppe |  |  |  |  |  | **-.07 (.05)** |
| Stephen Harper |  |  |  |  |  | **-.15 (.04)**** |
| Michael Ignatieff |  |  |  |  |  | **-.06 (.04)** |
| Jack Layton |  |  |  |  |  | **.34 (.06)**** |
| *Number of cases* | 722 | 694 | 691 | 690 | 684 | 682 |
| *Pseudo R-squared* | .06 | .23 | .36 | .36 | .39 | .45 |

Statistical significance: *<.10; **<.05

**Appendix: Syntax**

***** Vote Intentions .

compute int_lib = -99 .

if (cps11_11 eq 0) int_lib = 0 .

if (cps11_11 eq 1) int_lib = 1 .

if (cps11_11 eq 2) int_lib = 0 .

if (cps11_11 eq 3) int_lib = 0 .

if (cps11_11 eq 4) int_lib = 0 .

if (cps11_11 eq 5) int_lib = 0 .

if (cps11_11 eq 7) int_lib = -99 .

if (cps11_11 eq 8) int_lib = -99 .

if (cps11_11 eq 9) int_lib = -99 .

if (cps11_11 eq 98) int_lib = -99 .

if (cps11_11 eq 99) int_lib = -99 .

if (cps11_12 eq 0) int_lib = 0 .

if (cps11_12 eq 1) int_lib = 1 .

if (cps11_12 eq 2) int_lib = 0 .

if (cps11_12 eq 3) int_lib = 0 .

if (cps11_12 eq 4) int_lib = 0 .

if (cps11_12 eq 5) int_lib = 0 .

if (cps11_12 eq 7) int_lib = -99 .

if (cps11_12 eq 8) int_lib = -99 .

if (cps11_12 eq 9) int_lib = -99 .

if (cps11_12 eq 98) int_lib = -99 .

if (cps11_12 eq 99) int_lib = -99 .

if (cps11_13 eq 0) int_lib = 0 .

if (cps11_13 eq 1) int_lib = 1 .

if (cps11_13 eq 2) int_lib = 0 .

if (cps11_13 eq 3) int_lib = 0 .

if (cps11_13 eq 4) int_lib = 0 .

if (cps11_13 eq 5) int_lib = 0 .

if (cps11_13 eq 7) int_lib = -99 .

if (cps11_13 eq 8) int_lib = -99 .

if (cps11_13 eq 9) int_lib = -99 .

if (cps11_13 eq 98) int_lib = -99 .

if (cps11_13 eq 99) int_lib = -99 .

compute int_con = -99 .

if (cps11_11 eq 0) int_con = 0 .

if (cps11_11 eq 1) int_con = 0 .

if (cps11_11 eq 2) int_con = 1 .

if (cps11_11 eq 3) int_con = 0 .

if (cps11_11 eq 4) int_con = 0 .

if (cps11_11 eq 5) int_con = 0 .

if (cps11_11 eq 7) int_con = -99 .

if (cps11_11 eq 8) int_con = -99 .

if (cps11_11 eq 9) int_con = -99 .

if (cps11_11 eq 98) int_con = -99 .

if (cps11_11 eq 99) int_con = -99 .

if (cps11_12 eq 0) int_con = 0 .

if (cps11_12 eq 1) int_con = 0 .

if (cps11_12 eq 2) int_con = 1 .

if (cps11_12 eq 3) int_con = 0 .

if (cps11_12 eq 4) int_con = 0 .

if (cps11_12 eq 5) int_con = 0 .

if (cps11_12 eq 7) int_con = -99 .

if (cps11_12 eq 8) int_con = -99 .

if (cps11_12 eq 9) int_con = -99 .

if (cps11_12 eq 98) int_con = -99 .

if (cps11_12 eq 99) int_con = -99 .

if (cps11_13 eq 0) int_con = 0 .

if (cps11_13 eq 1) int_con = 0 .

if (cps11_13 eq 2) int_con = 1 .

if (cps11_13 eq 3) int_con = 0 .

if (cps11_13 eq 4) int_con = 0 .

if (cps11_13 eq 5) int_con = 0 .

if (cps11_13 eq 7) int_con = -99 .

if (cps11_13 eq 8) int_con = -99 .

if (cps11_13 eq 9) int_con = -99 .

if (cps11_13 eq 98) int_con = -99 .

if (cps11_13 eq 99) int_con = -99 .

compute int_ndp = -99 .

if (cps11_11 eq 0) int_ndp = 0 .

if (cps11_11 eq 1) int_ndp = 0 .

if (cps11_11 eq 2) int_ndp = 0 .

if (cps11_11 eq 3) int_ndp = 1 .

if (cps11_11 eq 4) int_ndp = 0 .

if (cps11_11 eq 5) int_ndp = 0 .

if (cps11_11 eq 7) int_ndp = -99 .

if (cps11_11 eq 8) int_ndp = -99 .

if (cps11_11 eq 9) int_ndp = -99 .

if (cps11_11 eq 98) int_ndp = -99 .

if (cps11_11 eq 99) int_ndp = -99 .

if (cps11_12 eq 0) int_ndp = 0 .

if (cps11_12 eq 1) int_ndp = 0 .

if (cps11_12 eq 2) int_ndp = 0 .

if (cps11_12 eq 3) int_ndp = 1 .

if (cps11_12 eq 4) int_ndp = 0 .

if (cps11_12 eq 5) int_ndp = 0 .

if (cps11_12 eq 7) int_ndp = -99 .

if (cps11_12 eq 8) int_ndp = -99 .

if (cps11_12 eq 9) int_ndp = -99 .

if (cps11_12 eq 98) int_ndp = -99 .

if (cps11_12 eq 99) int_ndp = -99 .

if (cps11_13 eq 0) int_ndp = 0 .

if (cps11_13 eq 1) int_ndp = 0 .

if (cps11_13 eq 2) int_ndp = 0 .

if (cps11_13 eq 3) int_ndp = 1 .

if (cps11_13 eq 4) int_ndp = 0 .

if (cps11_13 eq 5) int_ndp = 0 .

if (cps11_13 eq 7) int_ndp = -99 .

if (cps11_13 eq 8) int_ndp = -99 .

if (cps11_13 eq 9) int_ndp = -99 .

if (cps11_13 eq 98) int_ndp = -99 .

if (cps11_13 eq 99) int_ndp = -99 .

compute int_bloc = -99 .

if (cps11_11 eq 0) int_bloc = 0 .

if (cps11_11 eq 1) int_bloc = 0 .

if (cps11_11 eq 2) int_bloc = 0 .

if (cps11_11 eq 3) int_bloc = 0 .

if (cps11_11 eq 4) int_bloc = 1 .

if (cps11_11 eq 5) int_bloc = 0 .

if (cps11_11 eq 7) int_bloc = -99 .

if (cps11_11 eq 8) int_bloc = -99 .

if (cps11_11 eq 9) int_bloc = -99 .

if (cps11_11 eq 98) int_bloc = -99 .

if (cps11_11 eq 99) int_bloc = -99 .

if (cps11_12 eq 0) int_bloc = 0 .

if (cps11_12 eq 1) int_bloc = 0 .

if (cps11_12 eq 2) int_bloc = 0 .

if (cps11_12 eq 3) int_bloc = 0 .

if (cps11_12 eq 4) int_bloc = 1 .

if (cps11_12 eq 5) int_bloc = 0 .

if (cps11_12 eq 7) int_bloc = -99 .

if (cps11_12 eq 8) int_bloc = -99 .

if (cps11_12 eq 9) int_bloc = -99 .

if (cps11_12 eq 98) int_bloc = -99 .

if (cps11_12 eq 99) int_bloc = -99 .

if (cps11_13 eq 0) int_bloc = 0 .

if (cps11_13 eq 1) int_bloc = 0 .

if (cps11_13 eq 2) int_bloc = 0 .

if (cps11_13 eq 3) int_bloc = 0 .

if (cps11_13 eq 4) int_bloc = 1 .

if (cps11_13 eq 5) int_bloc = 0 .

if (cps11_13 eq 7) int_bloc = -99 .

if (cps11_13 eq 8) int_bloc = -99 .

if (cps11_13 eq 9) int_bloc = -99 .

if (cps11_13 eq 98) int_bloc = -99 .

if (cps11_13 eq 99) int_bloc = -99 .

compute int_green = -99 .

if (cps11_11 eq 0) int_green = 0 .

if (cps11_11 eq 1) int_green = 0 .

if (cps11_11 eq 2) int_green = 0 .

if (cps11_11 eq 3) int_green = 0 .

if (cps11_11 eq 4) int_green = 0 .

if (cps11_11 eq 5) int_green = 1 .

if (cps11_11 eq 7) int_green = -99 .

if (cps11_11 eq 8) int_green = -99 .

if (cps11_11 eq 9) int_green = -99 .

if (cps11_11 eq 98) int_green = -99 .

if (cps11_11 eq 99) int_green = -99 .

if (cps11_12 eq 0) int_green = 0 .

if (cps11_12 eq 1) int_green = 0 .

if (cps11_12 eq 2) int_green = 0 .

if (cps11_12 eq 3) int_green = 0 .

if (cps11_12 eq 4) int_green = 0 .

if (cps11_12 eq 5) int_green = 1 .

if (cps11_12 eq 7) int_green = -99 .

if (cps11_12 eq 8) int_green = -99 .

if (cps11_12 eq 9) int_green = -99 .

if (cps11_12 eq 98) int_green = -99 .

if (cps11_12 eq 99) int_green = -99 .

if (cps11_13 eq 0) int_green = 0 .

if (cps11_13 eq 1) int_green = 0 .

if (cps11_13 eq 2) int_green = 0 .

if (cps11_13 eq 3) int_green = 0 .

if (cps11_13 eq 4) int_green = 0 .

if (cps11_13 eq 5) int_green = 1 .

if (cps11_13 eq 7) int_green = -99 .

if (cps11_13 eq 8) int_green = -99 .

if (cps11_13 eq 9) int_green = -99 .

if (cps11_13 eq 98) int_green = -99 .

if (cps11_13 eq 99) int_green = -99 .

recode int_lib int_con int_ndp int_bloc int_green (-99=sysmis) (else=copy) .

compute intent = -99 .

if (int_lib eq 1) intent = 1 .

if (int_con eq 1) intent = 2 .

if (int_ndp eq 1) intent = 3 .

if (int_bloc eq 1) intent = 4 .

if (int_green eq 1) intent = 5 .

recode intent (-99=sysmis) (else=copy) .

value labels intent 1 'Liberal' 2 'Conservative' 3 'NDP' 4 'Bloc' 5 'Green'.

variable labels intent 'Vote Intention'.

recode intent (5=sysmis) (else=copy) into intentx .

value labels intentx 1 'Liberal' 2 'Conservative' 3 'NDP' 4 'Bloc' .

variable labels intentx 'Vote Intention'.

recode intent (1=2) (2=1) (3=3) (4=0) (5=sysmis) (else=copy) into intenty .

value labels intenty 1 'Conservative' 2 'Liberal' 3 'NDP' 0 'Bloc' .

variable labels intenty 'Vote Intention'.

***** Vote in 2011.

recode PES11_6 (0=0) (1=1) (2=2) (3=3) (4=4) (5=5) (6=6) (7=7) (8=9) (98,99=sysmis) into vote .

if (pes11_3 eq 5) vote = 7 .

value labels vote 0 'Other' 1 'Liberal' 2 'Conservative' 3 'NDP' 4 'Bloc' 5 'Green' 7 'Did not vote' 9 'None/spoiled'.

variable labels vote 'Vote in PES'.

recode vote (1=1) (2=2) (3=3) (4=4) (else=sysmis) into votex .

value labels votex 1 'Liberal' 2 'Conservative' 3 'NDP' 4 'Bloc' .

variable labels votex 'Vote in PES'.

recode vote (1=2) (2=1) (3=3) (4=0) (else=sysmis) into votey .

value labels votey 1 'Conservative' 2 'Liberal' 3 'NDP' 0 'Bloc' .

variable labels votey 'Vote in PES'.

recode vote (1=2) (2=1) (3=3) (4=4) (5=5) (7=7) (else=sysmis) into votez .

value labels votez 1 'Conservative' 2 'Liberal' 3 'NDP' 4 'Bloc' 5 'Green' 7 'Did not vote' .

variable labels votez 'Vote in PES'.

*****Social Demographics.

*****Regions.

recode province (10 thru 13=1) (24=2) (35=3) (46 thru 59=4) into regions.

value labels regions 1 'atlantic' 2 'quebec' 3 'ontario' 4 'west'.

recode regions (1=1) (2,3,4=0) into atlantic.

recode regions (2=1) (1,3,4=0) into quebec.

recode regions (4=1) (1,2,3=0) into west.

variable labels regions 'region' /atlantic 'atlantic canada' /quebec 'quebec' /west 'western canada' .

*****Gender.

recode rgender (1=0) (5=1) into female .

variable labels female 'female' .

*****Age.

missing values cps11_78 (9998,9999).

compute age=2011-cps11_78.

recode age (18 thru 34=0) (35 thru 54=1) (55 thru 98=2) into agegrp.

value labels agegrp 0 '18 to 34' 1 '35 to 54' 2 '55 and over'.

recode age (18 thru 34=1) (35 thru 97=0) into under35.

recode age (55 thru 97=1) (18 thru 54=0) into over54.

variable labels age 'age ' .

** religion.

if (cps11_80 lt 99) cathol=0.

if (cps11_80 eq 4) cathol=1.

if (cps11_80 eq 5) cathol=1.

*****Ethnicity.

if (cps11_85 lt 99) visible=0.

if (cps11_85 eq 4 or cps11_86 eq 4) visible=1.

if (cps11_85 eq 5 or cps11_86 eq 5) visible=1.

if (cps11_85 eq 6 or cps11_86 eq 6) visible=1.

if (cps11_85 eq 8 or cps11_86 eq 8) visible=1.

if (cps11_85 eq 14 or cps11_86 eq 14) visible=1.

if (cps11_85 eq 15 or cps11_86 eq 15) visible=1.

if (cps11_85 eq 20 or cps11_86 eq 20) visible=1.

if (cps11_85 eq 21 or cps11_86 eq 21) visible=1.

if (cps11_85 eq 26 or cps11_86 eq 26) visible=1.

if (cps11_85 eq 28 or cps11_86 eq 28) visible=1.

if (cps11_85 eq 29 or cps11_86 eq 29) visible=1.

if (cps11_85 eq 31 or cps11_86 eq 31) visible=1.

if (cps11_85 eq 32 or cps11_86 eq 32) visible=1.

if (cps11_85 eq 36 or cps11_86 eq 36) visible=1.

if (cps11_85 eq 38 or cps11_86 eq 38) visible=1.

if (cps11_85 eq 39 or cps11_86 eq 39) visible=1.

if (cps11_85 eq 45 or cps11_86 eq 45) visible=1.

if (cps11_85 eq 46 or cps11_86 eq 46) visible=1.

if (cps11_85 eq 49 or cps11_86 eq 49) visible=1.

if (cps11_85 eq 51 or cps11_86 eq 51) visible=1.

if (cps11_85 eq 52 or cps11_86 eq 52) visible=1.

if (cps11_85 eq 54 or cps11_86 eq 54) visible=1.

if (cps11_85 eq 59 or cps11_86 eq 59) visible=1.

if (cps11_85 eq 60 or cps11_86 eq 60) visible=1.

if (cps11_85 eq 61 or cps11_86 eq 61) visible=1.

if (cps11_85 eq 62 or cps11_86 eq 62) visible=1.

if (cps11_85 eq 63 or cps11_86 eq 63) visible=1.

if (cps11_85 eq 64 or cps11_86 eq 64) visible=1.

if (cps11_85 eq 99) visible=99.

recode visible (99=sysmis) (else=copy).

variable labels visible 'visible minority' .

*****First language.

recode cps11_90 (1=1) (5=2) (99=sysmis) (98=98) (sysmis=sysmis) (else=3) into language.

if (language eq 98 and CPS_INTLANG eq 1) language=1.

if (language eq 98 and CPS_INTLANG eq 5) language=2.

value labels language 1 'English' 2 'French' 3 'Other' .

variable labels language 'language '.

recode language (2=1) (1,3=0) (else=sysmis) into french.

recode language (1,3=1) (2=0) (else=sysmis) into nonfrench .

variable labels french 'french language' /nonfrench 'non-french language' .

*****Education.

recode cps11_79 (1 thru 4=0) (5=1) (6 thru 8=2) (9 thru 11=3) (98,99=sysmis) into school .

value labels school 0 'less than high school' 1 'high school' 2 'some post-secondary' 3 'university graduate'.

recode school (0=1) (1,2,3=0) (else=sysmis) into dropout .

recode school (3=1) (0,1,2=0) (else=sysmis) into univgrad .

variable labels school 'education' /dropout 'hs drop out' /univgrad 'university graduate' .

*****Union membership.

recode pes11_93 (1=1) (5=0) (98,99=sysmis) into union_m .

if (cps11_91 le 98) union_m = 0.

if (pes11_93 eq 1) union_m = 1 .

compute union_h = union_m .

if (pes11_94 eq 1) union_h = 1 .

variable labels union_m 'union member' /union_h 'union household' .

******General orientations.

*****Québec (ROC only).

recode pes11_44 (1=1) (2=.33) (3,7,8=.0) (4=-.33) (5=-1) (9=sysmis) into doquebec.

value labels doquebec -1 'much less' -.33 'somewhat less' 0 'same, dk' .33 'somewhat more' 1 'much more'.

recode pes11_13 (998=50) (999=sysmis) (else=copy) into feelqc.

compute feelqc=(feelqc-50)/50.

value labels feelqc -1 'really dislike Quebec' 0 'dk' 1'really like Quebec'.

variable labels doquebec 'do more for Quebec'/feelqc 'like Quebec'.

compute vquebec = (doquebec+feelqc)/2 .

variable labels vquebec 'views towards Quebec'.

*****Support for sovereignty (Québec only).

recode cps11_75 (1=1) (3=.33) (98=0) (5=-.33) (7=-1) (99=sysmis) into sovqc.

value labels sovqc 1 'very favourable' .33 'somewhat favourable' 0 'DK' -.33 'somewhat opposed' -1 'very opposed'.

variable labels sovqc 'Quebec sovereignty'.

*****Continentalism.

recode pes11_12 (998=50) (999=sysmis) (else=copy) into feelus.

compute feelus=(feelus-50)/50.

value labels feelus 1 'really like the US' 0 'dk' -1 'really dislike the US'.

recode pes11_45 (1=1) (2=.33) (3,6,8=0) (4=-.33) (5=-1) (9=sysmis) into usties.

value labels usties 1 'much closer' .33 'somewhat closer' 0 'same/dk' -.33 'somewhat more distant' -1 'much more distant'.

variable labels usties 'closer US ties' /feelus 'like the US'.

compute continent=(feelus+usties)/2 .

variable labels continent 'continentalism'.

*****Market liberalism.

recode pes11_22 (1=1) (3=.33) (8=0) (5=-.33) (7=-1) (9=sysmis) into jobspriv.

value labels jobspriv -1 'strongly disagree' -.33 'somewhat disagree' 0 'dk' .33 'somewhat agree' 1 'strongly agree'.

recode pes11_49 (1=1) (3=.33) (8=0) (5=-.33) (7=-1) (9=sysmis) into blame.

value labels blame -1 'strongly disagree' -.33 'somewhat disagree' 0 'dk' .33 'somewhat agree' 1 'strongly agree'.

recode pes11_47 (1=1) (3=.33) (8=0) (5=-.33) (7=-1) (9=sysmis) into benefit.

value labels benefit -1 'stronglydisagree' -.33 'somewhatdisagree' 0 'dk' .33 'somewhat agree' 1 'strongly agree'.

recode pes11_24 (1=1) (3=.33) (8=0) (5=-.33) (7=-1) (9=sysmis) into movejobs.

value labels movejobs -1 'strongly disagree' -.33 'somewhat disagree' 0 'dk' .33 'somewhat agree' 1 'strongly agree'.

recode pes11_41 (1=-1) (2=-.33) (3,7,8=0) (4=.33) (5=1) (9=sysmis) into poorgap.

value labels poorgap 1 'much less' .33 'somewhat less' 0 'same/dk' -.33 'somewhat more' -1 'much more'.

variable labels jobspriv 'leave jobs to private sector' /blame 'blame self for not getting ahead' /benefit 'business benefits all' /

movejobs 'move to region with jobs' /poorgap 'do less to reduce the income gap' .

compute market=(jobspriv+blame+benefit+movejobs+poorgap)/5 .

variable labels market 'market liberalism'.

*****Moral traditionalism.

recode pes11_26 (1=1) (3=.33) (8=0) (5=-.33) (7=-1) (9=sysmis) into stayhome.

value labels stayhome -1 'strongly disagree' -.33 'somewhat disagree' 0 'dk' .33 'somewhat agree' 1 'strongly agree'.

recode pes11_43 (1=-1) (2=-.33) (3,7,8=0) (4=.33) (5=1) (9=sysmis) into dowomen.

value labels dowomen 1 'much less' .33 'somewhat less' 0 'same/dk' -.33 'somewhat more' -1 'much more'.

recode pes11_17 (998=50) (999=sysmis) (else=copy) into antifem.

compute antifem=(50-antifem)/50.

value labels antifem 1 'really dislike feminists' 0 'dk/neutral' -1'really like feminists'.

recode pes11_16 (998=50) (999=sysmis) (else=copy) into feelgays.

compute feelgays=(50-feelgays)/50.

value labels feelgays -1 'really like gays' 0 'dk/neutral' 1'really dislike gays'.

variable labels stayhome 'women stay home' /feelgays 'dislike gays/lesbians'.

variable labels dowomen 'do less for women' /antifem 'dislike feminists'.

compute moral=(stayhome+dowomen+antifem+feelgays)/4.

variable labels moral 'moral traditionalism'.

*****Political disaffection.

recode cps11_0 (1=-1) (3=-.33) (8=0) (5=.33) (7=1) (9=sysmis) into democracy.

recode pes11_54 (1=-1) (3,7,8=0) (5=1) (9=sysmis) into promises.

value labels democracy -1 'very satisfied' -.33 'fairly satisfied' 0 'dk' .33 'not very satisfied' 1 'not satisfied at all'/

promises -1 'most of the time' 0 'some of the time/depends/dk' 1 'hardly ever'.

recode pes11_14 (996,998=50) (999=sysmis) (else=copy) into feelpoli.

compute feelpoli=(50-feelpoli)/50.

value labels feelpoli 1 'really dislike politicians' 0 'neutral/dk' -1 'really like politicians'.

recode pes11_48 pes11_50 (1=1) (3=.33) (8=0) (5=-.33) (7=-1) (9=sysmis) into dontcare polslie.

value labels dontcare polslie 1 'strongly agree' .33 'somewhat agree' 0 'dk' -.33 'somewhat disagree' -1 'strongly disagree'.

variable labels democracy 'dissatisfied with democracy' /promises 'parties break their promises' /feelpoli 'dislike politicians' / dontcare 'government does not care what people think' /polslie 'politicians lie to get elected'.

compute cynicism=(democracy+promises+feelpoli+dontcare+polslie)/5 .

variable labels cynicism 'political disaffection'.

*****Regional alienation.

recode pes11_38 (1=-1) (3=1) (5,8=0) (9=sysmis) into alienreg.

value labels alienreg -1 'better' 0 'same/dk' 1 'worse'.

variable labels alienreg 'federal treatment of province'.

*****Party identification.

if (cps11_71 le 8) pid_con = 0 .

if (cps11_71 le 8) pid_lib = 0 .

if (cps11_71 le 8) pid_ndp = 0 .

if (cps11_71 le 8) pid_bloc = 0 .

if (cps11_71 le 8) pid_green = 0 .

if ( cps11_71 eq 1 and cps11_72 eq 1) pid_lib = 1 .

if ( cps11_71 eq 1 and cps11_72 eq 3) pid_lib = 1 .

if ( cps11_71 eq 2 and cps11_72 eq 1) pid_con = 1 .

if ( cps11_71 eq 2 and cps11_72 eq 3) pid_con = 1 .

if ( cps11_71 eq 3 and cps11_72 eq 1) pid_ndp = 1 .

if ( cps11_71 eq 3 and cps11_72 eq 3) pid_ndp = 1 .

if ( cps11_71 eq 4 and cps11_72 eq 1) pid_bloc = 1 .

if ( cps11_71 eq 4 and cps11_72 eq 3) pid_bloc = 1 .

if ( cps11_71 eq 5 and cps11_72 eq 1) pid_green = 1 .

if ( cps11_71 eq 5 and cps11_72 eq 3) pid_green = 1 .

variable labels pid_lib 'Liberal PID'/pid_con 'Conservative PID'/pid_ndp 'NDP PID'/

pid_bloc 'BLOC PID'/pid_green 'Green PID'.

*****Economic perceptions.

recode cps11_39 (1=1) (5,8=0) (3=-1) (9=sysmis) into retrocan .

recode cps11_66 (1=1) (5,8=0) (3=-1) (9=sysmis) into retroper.

value labels retroper retrocan 1 'got better' 0 'same DK' -1 'got worse'.

variable labels retrocan 'canadian economy better' /retroper 'personal finances better'.

***** Issue attitudes.

recode cps11_30 cps11_31 (3=-1) (5,8=0) (1=1) (9=sysmis) into tax_pers tax_corp .

value labels tax_pers tax_corp 1 'increase' 0 'same / DK' -1 'decrease'.

variable labels tax_pers 'Personal taxes' /tax_corp 'Corporate taxes'.

recode cps11_32 cps11_33 cps11_34 cps11_35 cps11_36 cps11_37 cps11_38 (1=1) (3=-1) (5,8=0) (9=sysmis) into sp_heal sp_welf sp_educ sp_env sp_crim sp_def sp_immi .

value labels sp_heal sp_welf sp_educ sp_env sp_crim sp_def sp_immi 1 'spend more' 0 'same / DK' -1 'spend less'.

variable labels sp_heal 'spending on healthcare ' / sp_welf 'spending on welfare ' / sp_educ 'spending on education ' / sp_env 'spending on environment' / sp_crim 'spending on crime and justice' / sp_def 'spending on defence ' / sp_immi 'spending on immigrants and minorities' .

recode pes11_28 (1=1) (5,8=0) (3=-1) (9=sysmis) into immig .

value labels immig 1 'more' 0 'same / DK' -1 'fewer'.

variable labels immig 'admit more immigrants' .

recode pes11_37 (1=1) (8=0) (5=-1) (9=sysmis) into troops .

value labels troops 1 'good thing' 0 'DK' -1 'bad thing'.

variable labels troops 'troops fighting in Afghanistan' .

*****Leader evaluations.

recode cps11_23 cps11_24 cps11_25 cps11_26 cps11_27 (996,997,998=50) (999=sysis) (else=copy)

into feel_harper feel_ignatieff feel_layton feel_duceppe feel_may .

compute F_Harper=(feel_harper-50)/50.

compute F_Ignatieff=(feel_ignatieff-50)/50.

compute F_Layton=(feel_layton-50)/50.

compute F_Duceppe=(feel_duceppe-50)/50.

compute F_May=(feel_may-50)/50.

variable labels F_Harper 'like Harper' /F_Ignatieff 'like Ignatieff' /F_Layton 'like Layton' /F_Duceppe 'like Duceppe' /F_May 'like May' .
